# Supplementary material
Source: HighWire-hosted journal article supplement (https://genome.cshlp.org/content/suppl/2004/01/13/14.2.221)
Supplement: Westberg-16733_Legend_SuppFigA.pdf [file Westberg-16733_Legend_SuppFigA.pdf]

Legends of Supplemental Figure A.

**Supplemental Figure A.** Gene map of the *MmymySC* genome. The genes representing different functional categories are shown in the same colours as in Figure 1 of the printed paper version. The truncated genes are shown in dark red, the tRNA genes in light green, the rRNA genes in medium blue, and the insertion sequences in dark orange.
